# Supplementary material for: Adsorption of Congo Red and Methylene Blue onto Nanopore-Structured Ashitaba Waste and Walnut Shell-Based Activated Carbons: Statistical Thermodynamic Investigations, Pore Size and Site Energy Distribution Studies
Source: MDPI journal article supplement (doi:10.3390/nano12213831), 2022-10-29
Supplement: s1 [file s1]

# Adsorption of Congo Red and Methylene Blue onto Nanopore-structured Ashitaba Waste and Walnut Shell-Based Activated Carbons: Statistical Thermodynamic Investigations, Pore Size and Site Energy Distribution Studies

Lei Zhang <sup>1,2</sup>, Libin Yang <sup>1,2,3</sup>, Jiabin Chen <sup>1,2,3</sup>, Wenjun Yin <sup>1,2</sup>, Yalei Zhang <sup>1,2,3</sup>, Xuefei Zhou <sup>1,2,3</sup>, Feng Gao <sup>1,2,3,\*</sup> and Jiang Zhao <sup>1,2,3,\*</sup>

<sup>1</sup> State Key Laboratory of Pollution Control and Resources Reuse, College of Environmental Science and Engineering, Tongji University, Shanghai 200092, China

<sup>2</sup> Key Laboratory of Yangtze Water Environment for Ministry of Education, College of Environmental Science and Engineering, Tongji University, Shanghai 200092, China

<sup>3</sup> Shanghai Institute of Pollution Control and Ecological Security, Tongji University, Shanghai 200092, China

\* Correspondence: gaofeng\_1111@126.com (F.G.); jiangzhao@tongji.edu.cn (J.Z.)

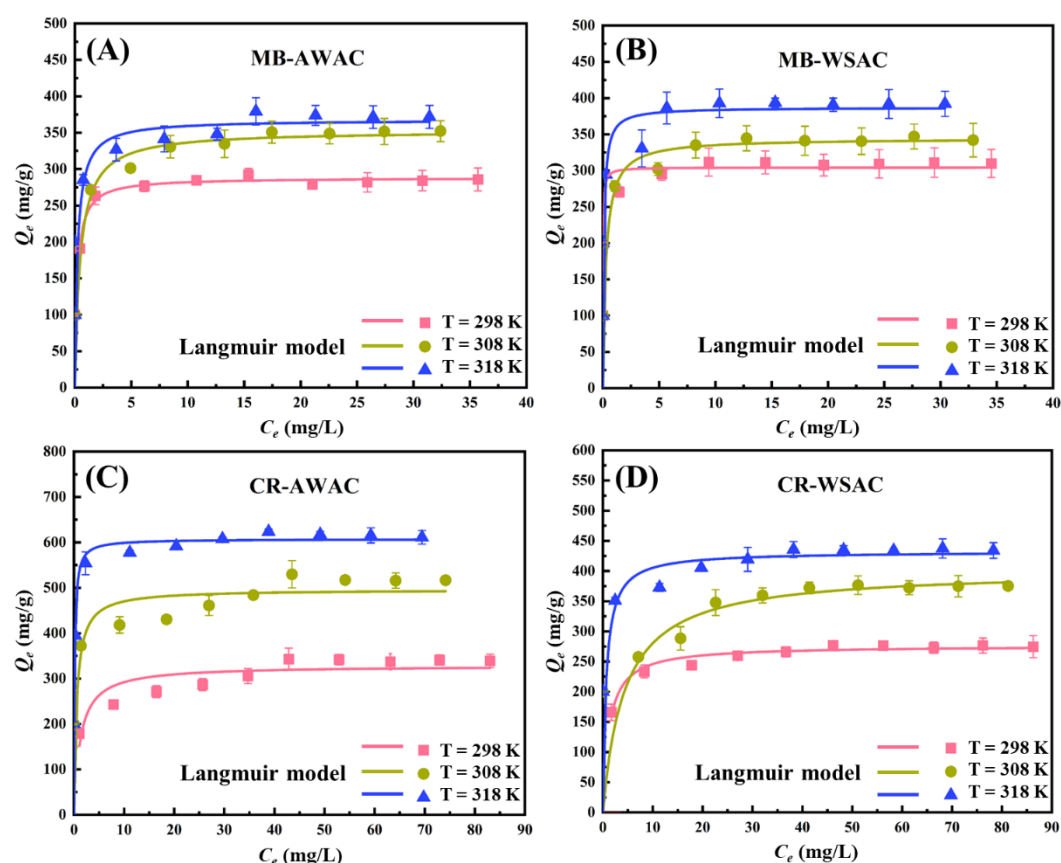

**Figure S1.** Experimental adsorption isotherms for four adsorption systems (MB-AWAC (A), MB-WSAC (B), CR-AWAC (C) and CR-WSAC (D)) at 298–318 K, pH=7, and corresponding fitting curves by Langmuir model.

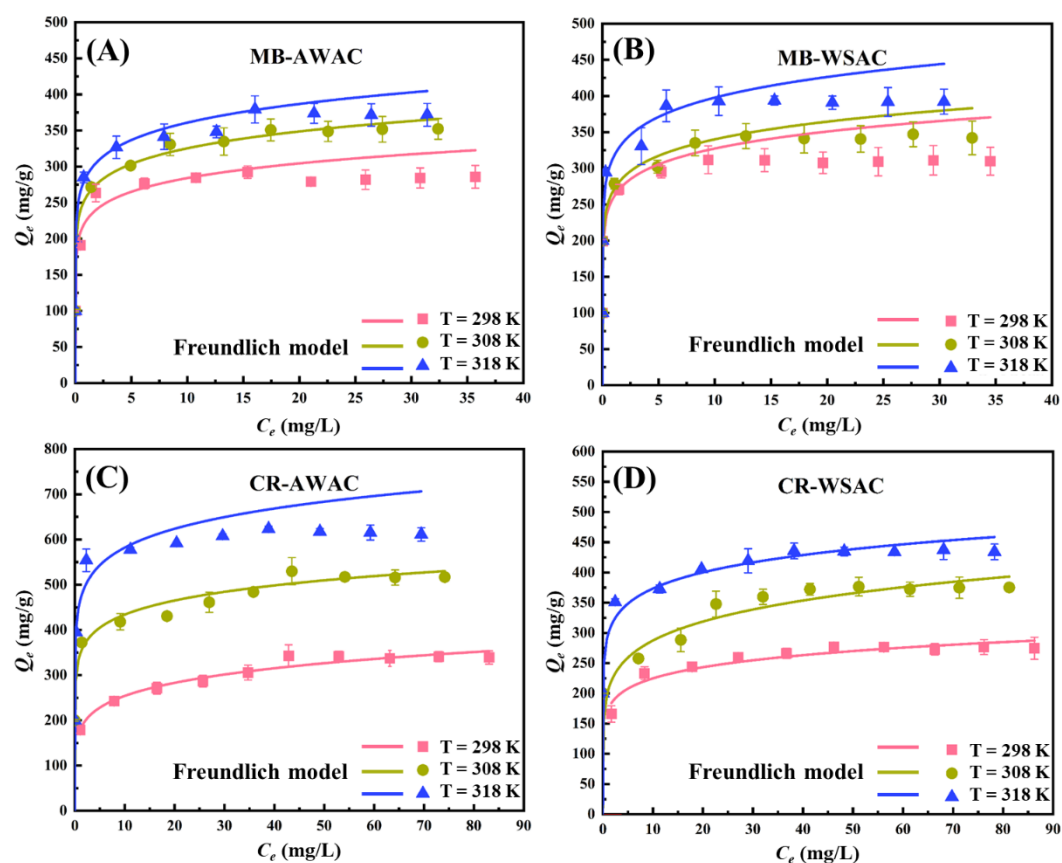

**Figure S2.** Experimental adsorption isotherms for four adsorption systems (MB-AWAC (A), MB-WSAC (B), CR-AWAC (C) and CR-WSAC (D)) at 298–318 K, pH=7, and corresponding fitting curves by Freundlich model.
